# Supplementary material for: 6-Hydroxyindole-based borondipyrromethene: Synthesis and spectroscopic studies
Source: Royal Society of Chemistry journal article supplement (doi:10.1039/c1ob06200j), 2011-09-30

## Supporting Information

### **6-Hydroxyindole-Based Borondipyrromethene: Synthesis and Spectroscopic Studies**

Chunchang Zhao,\* Peng Feng,† Jian Cao,† Yulin Zhang, Xuzhe Wang, Yang Yang, Yanfen Zhang, Jinxin Zhang

Key Laboratory for Advanced Materials and Institute of Fine Chemicals, East China

University of Science & Technology, Shanghai 200237, P. R. China

zhaocchang@ecust.edu.cn

† These two authors contributed equally

|         |                                                                                                                                |
|---------|--------------------------------------------------------------------------------------------------------------------------------|
| S2      | General Methods and synthesis                                                                                                  |
| S3-S4   | Photophysical data for <b>BODIPY-OH</b> and <b>BODIPY-OMe</b> in various solvents in the absence and presence of organic bases |
| S5-S10  | UV-vis and emission spectra                                                                                                    |
| S11     | HPLC analysis of <b>BODIPY-OH</b> and <b>BODIPY-OMe</b>                                                                        |
| S12-S13 | NMR spectra                                                                                                                    |
| S14     | HRMS spectra                                                                                                                   |

## General Methods

All chemical reagents and solvents for synthesis were purchased from commercial suppliers and were used without further purification. All moisture-sensitive reactions were carried out under an atmosphere of argon.  $^1\text{H}$  NMR and  $^{13}\text{C}$  NMR spectra were recorded on a Bruker AV-400 spectrometer with chemical shifts reported in ppm (in  $\text{CDCl}_3$ , TMS as internal standard) at room temperature. Mass spectra were measured on a HP 1100 LC-MS spectrometer.

UV-vis absorption spectra were recorded on a Varian Cary 100 spectrophotometer. Fluorescence spectra were measured with a Varian CARY Eclipse Fluorescence spectrophotometer. Fluorescence quantum yields were determined by comparing the corrected fluorescence spectra with that of Rhodamine B in EtOH ( $\Phi_{\text{F}}$  0.89) as the standard. Spectroscopic measurements were made in a quartz cuvette (1 cm path length) at room temperature. Spectral-grade solvents were used for measurements of UV-vis absorption and fluorescence.

Table S1. Absorption data for **BODIPY-OH** and **BODIPY-OMe** in various solvents in the absence or presence of organic bases.

| Solvent         | $E_T$ (N) | $\lambda_{ab}$ (nm) |             |               | $\lambda_{ab}$ (nm) |                |
|-----------------|-----------|---------------------|-------------|---------------|---------------------|----------------|
|                 |           | <b>-OH</b>          | <b>-OMe</b> | <b>-OH+BA</b> | <b>-OH+DBN</b>      | <b>-OH+DBU</b> |
| water           | 1.000     | 546                 | 551         | 596           | 598                 | 598            |
| methanol        | 0.762     | 548                 | 544         | 553           | 611                 | 611            |
|                 |           |                     |             | 610           |                     |                |
| ethanol         | 0.654     | 553                 |             | 554           | 624                 | 624            |
|                 |           |                     |             | 622           |                     |                |
| 1-butanol       | 0.586     | 558                 |             | 558           | 628                 | 628            |
|                 |           |                     |             | 625           |                     |                |
| 2-propanol      | 0.546     | 556                 |             | 556           | 630                 | 630            |
|                 |           |                     |             | 627           |                     |                |
| acetonitrile    | 0.460     | 542                 | 540         | 542           | 634                 | 634            |
|                 |           |                     |             | 634           |                     |                |
| DMSO            | 0.444     | 558                 | 546         | 645           | 644                 | 645            |
|                 |           | 644                 |             |               |                     |                |
| DMF             | 0.386     | 553                 |             | 556           | 642                 | 642            |
|                 |           |                     |             | 642           |                     |                |
| dichloromethane | 0.309     | 545                 | 546         | 549           | 631                 | 632            |
| benzene         | 0.111     | 553                 |             | 562           | 580                 | 581            |
|                 |           |                     |             |               | 628                 | 635            |
| toluene         | 0.099     | 563                 | 555         | 566           | 580                 | 582            |
|                 |           |                     |             |               | 629                 | 633            |

Table S2. Fluorescence of **BODIPY-OH** and **BODIPY-OMe** in various solvents in the absence or presence of organic bases.

| Solvent         | $E_T(N)$ | $\lambda_{em}$ (nm) [ $\Phi_F$ ] |             |               | $\lambda_{em}$ (nm)[ $\Phi_F$ ] |                |
|-----------------|----------|----------------------------------|-------------|---------------|---------------------------------|----------------|
|                 |          | <b>-OH</b>                       | <b>-OMe</b> | <b>-OH+BA</b> | <b>-OH+DBN</b>                  | <b>-OH+DBU</b> |
| water           | 1.000    |                                  |             | 632           | 629                             | 632            |
|                 |          |                                  |             |               | [0.18]                          |                |
| methanol        | 0.762    | 577                              | 567         | 576           | 642                             | 647            |
|                 |          | [0.25]                           |             | 643           | [0.22]                          |                |
| ethanol         | 0.654    | 580                              |             | 580           | 650                             | 653            |
|                 |          | [0.30]                           |             | 652           | [0.19]                          |                |
| 1-butanol       | 0.586    | 583                              |             | 583           | 654                             | 658            |
|                 |          | [0.31]                           |             | 654           | [0.19]                          |                |
| 2-propanol      | 0.546    | 582                              |             | 581           | 656                             | 656            |
|                 |          | [0.28]                           |             | 655           | [0.17]                          |                |
| acetonitrile    | 0.460    | 571                              | 567         | 571           | 664                             | 670            |
|                 |          | [0.22]                           |             | 666           | [0.17]                          |                |
| DMSO            | 0.444    | 583                              | 574         | 681           | 675                             | 681            |
|                 |          | 680                              |             |               | [0.18]                          |                |
|                 |          | [0.34]                           |             |               |                                 |                |
| DMF             | 0.386    | 583                              |             | 581           | 672                             | 676            |
|                 |          | [0.31]                           |             | 674           | [0.17]                          |                |
| dichloromethane | 0.309    | 577                              | 571         | 581           | 656                             | 661            |
|                 |          | [0.30]                           |             |               | [0.24]                          |                |
| benzene         | 0.111    | 573                              |             | 583           | 655                             | 656            |
|                 |          | [0.44]                           |             |               | [0.26]                          |                |
| toluene         | 0.099    | 586                              | 573         | 588           | 655                             | 661            |
|                 |          | [0.40]                           |             |               | [0.24]                          |                |

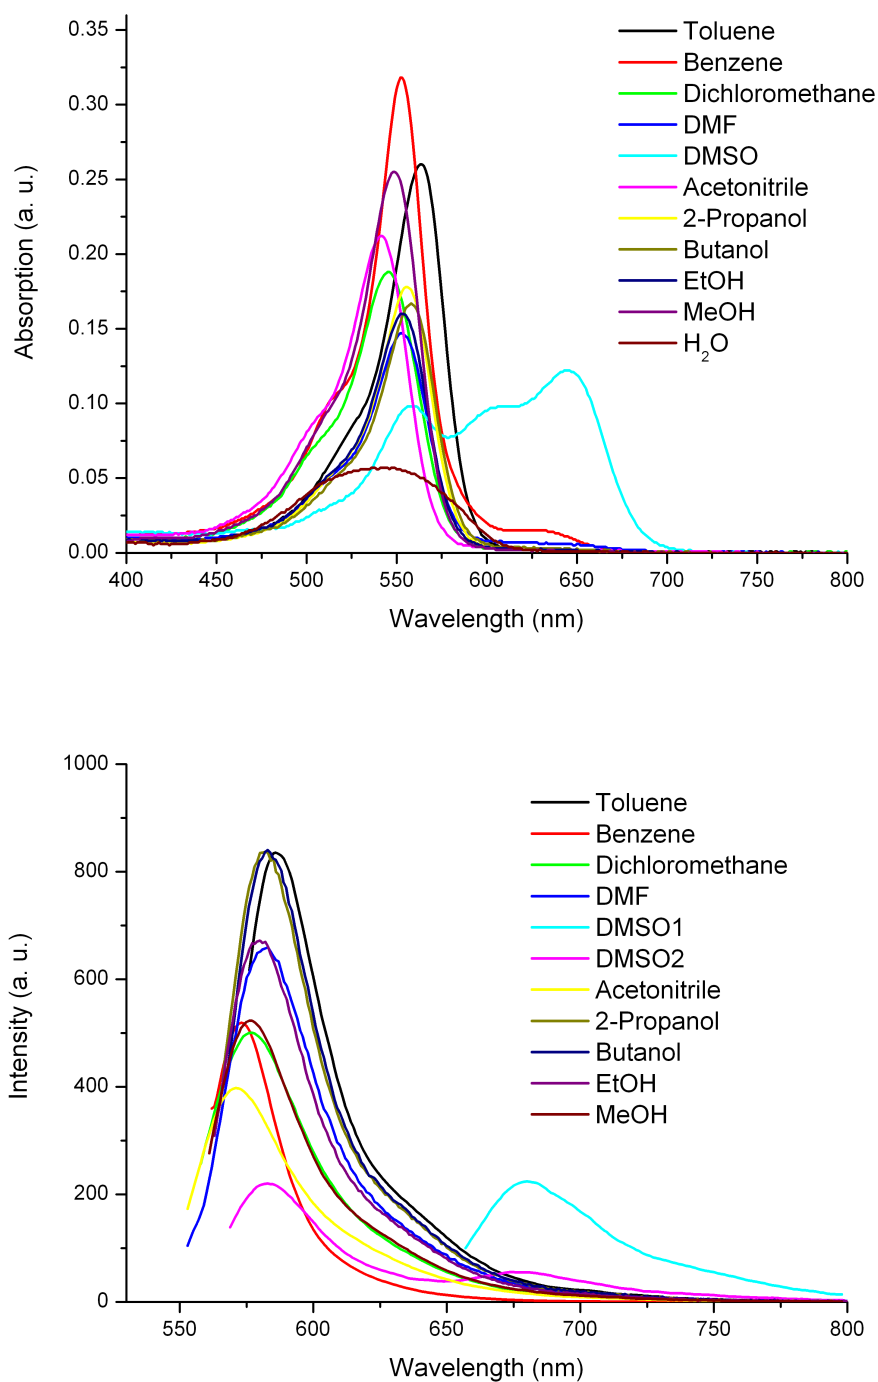

Figure S1. Absorption (top) and fluorescence (bottom) spectra of **BODIPY-OH** in various solvents. DMSO1: fluorescence recorded at the shorter excitation wavelength ( $\lambda_{\text{ex}} = 558 \text{ nm}$ ); DMSO2: fluorescence recorded at the second excitation wavelength ( $\lambda_{\text{ex}} = 644 \text{ nm}$ ).

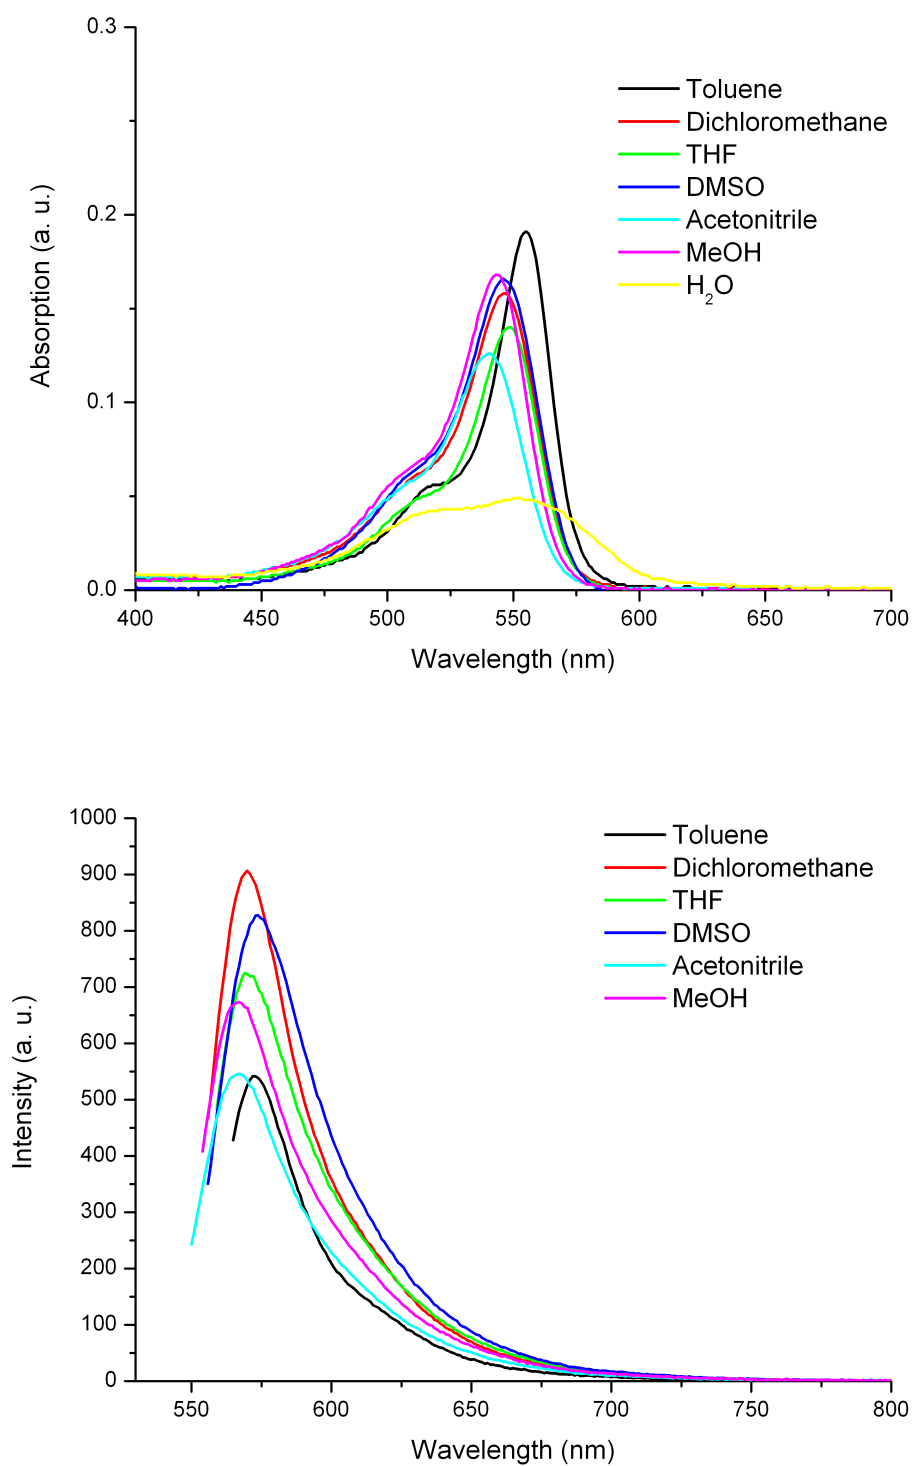

Figure S2 . Absorption and emission spectra of **BODIPY-OMe** in various solvents.

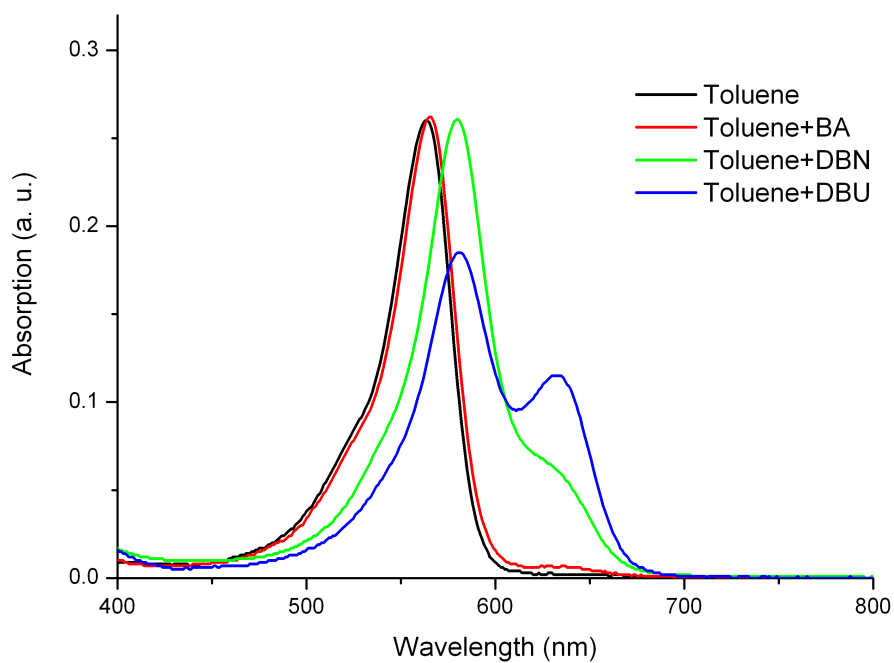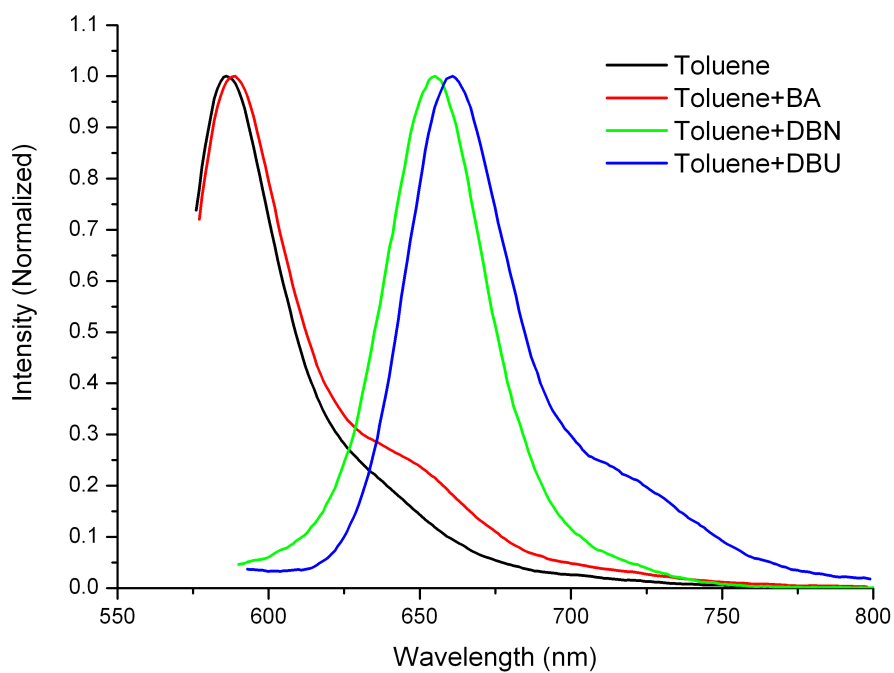

**Figure S3.** UV-vis absorption and fluorescence spectra of **BODIPY-OH** ( $5.0 \times 10^{-6}$  M) in toluene containing organic bases.

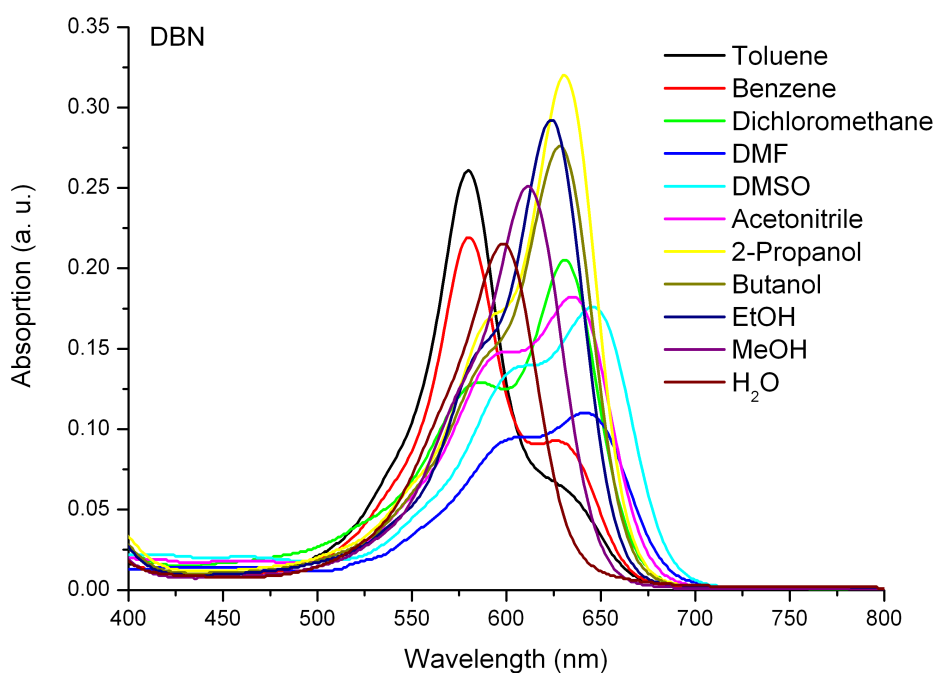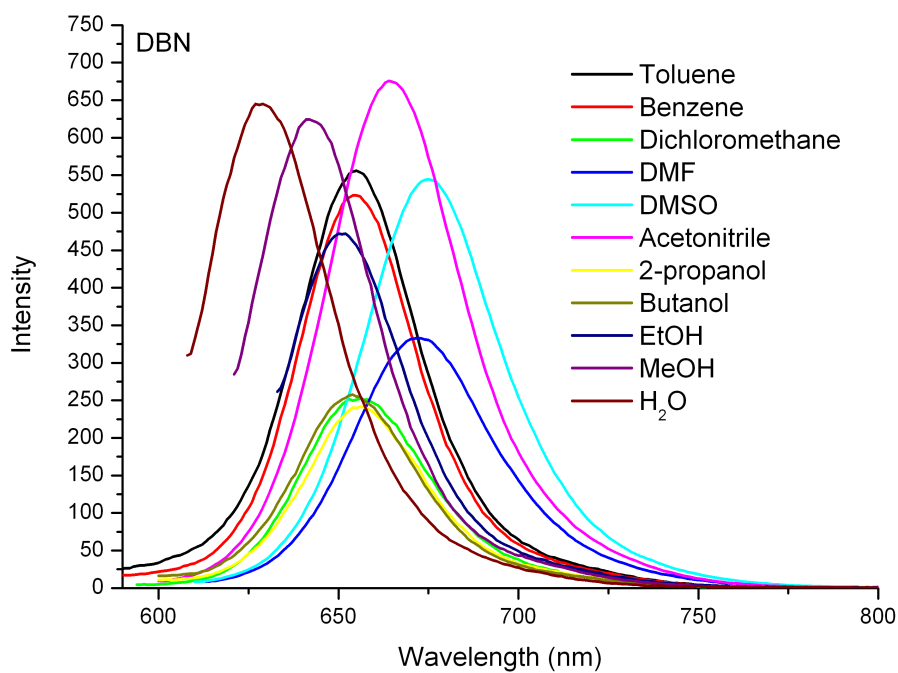

Figure S4. Effects of DBN on the absorption and fluorescence spectra of **BODIPY-OH** ( $5.0 \times 10^{-6}$  M).



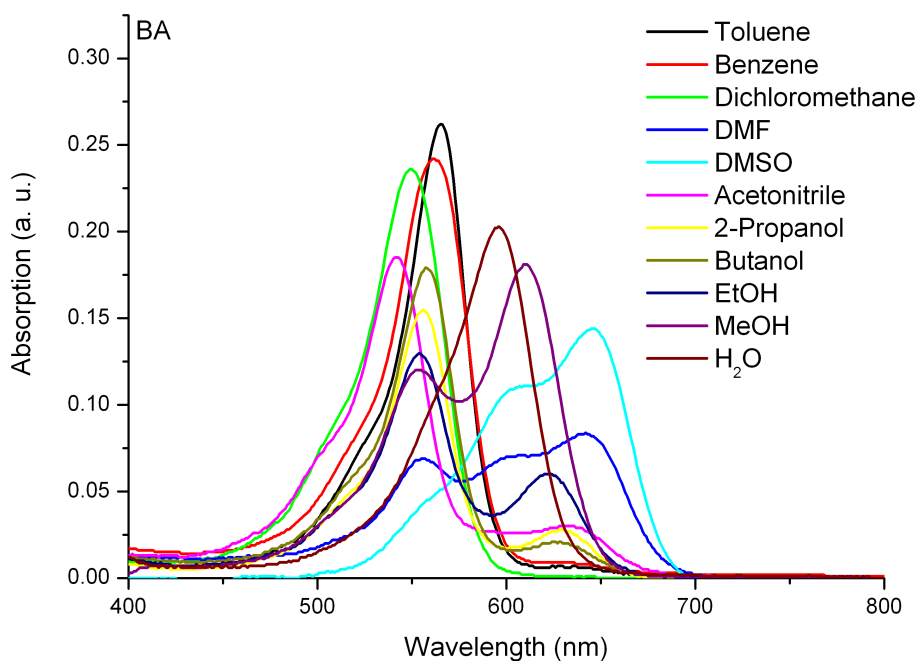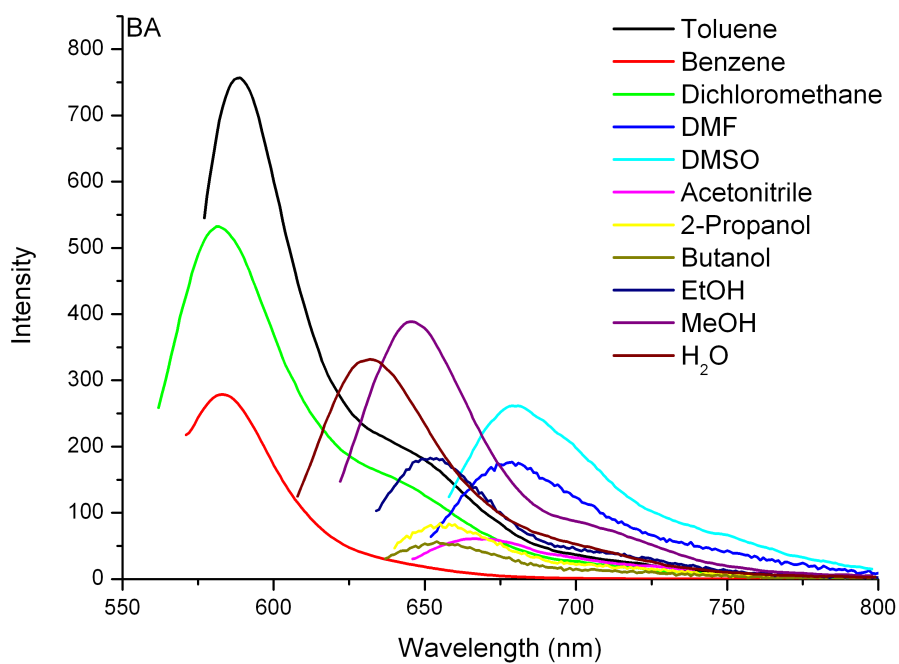

Figure S5. Effects of BA on the absorption and fluorescence spectra of **BODIPY-OH** ( $5.0 \times 10^{-6}$  M). Fluorescence spectra were recorded at excitation of the longer absorption maximum.

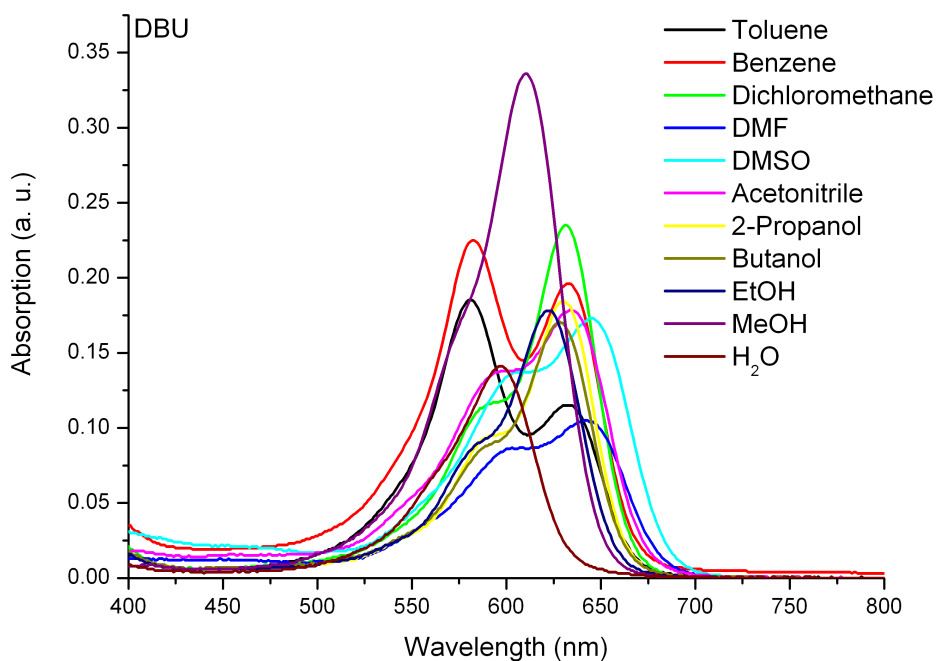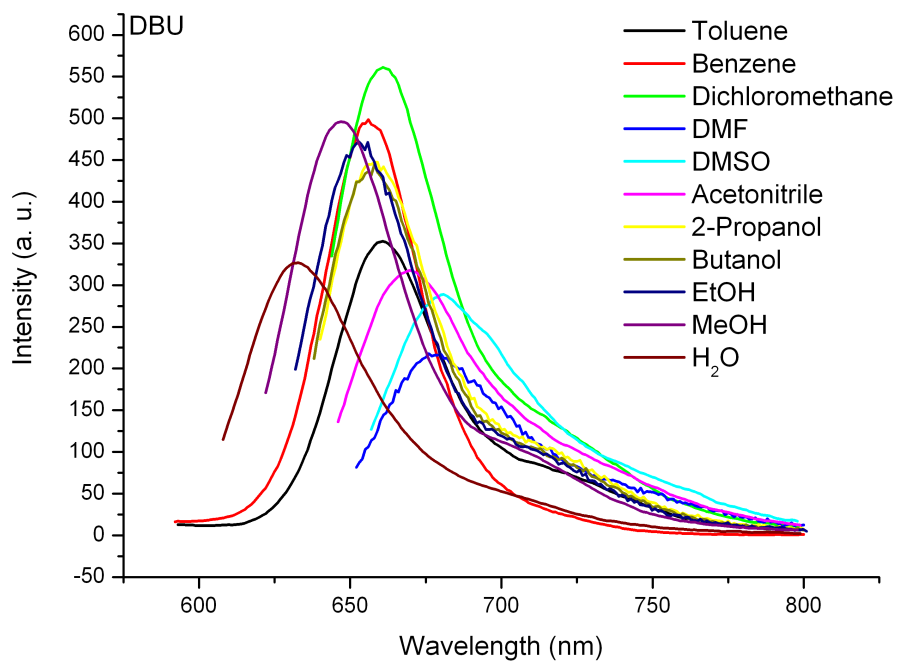

Figure S6. Effects of DBU on the absorption and fluorescence spectra of **BODIPY-OH** ( $5.0 \times 10^{-6}$  M).

0.6ml/min 540 nm CH<sub>3</sub>CN:H<sub>2</sub>O=7:3

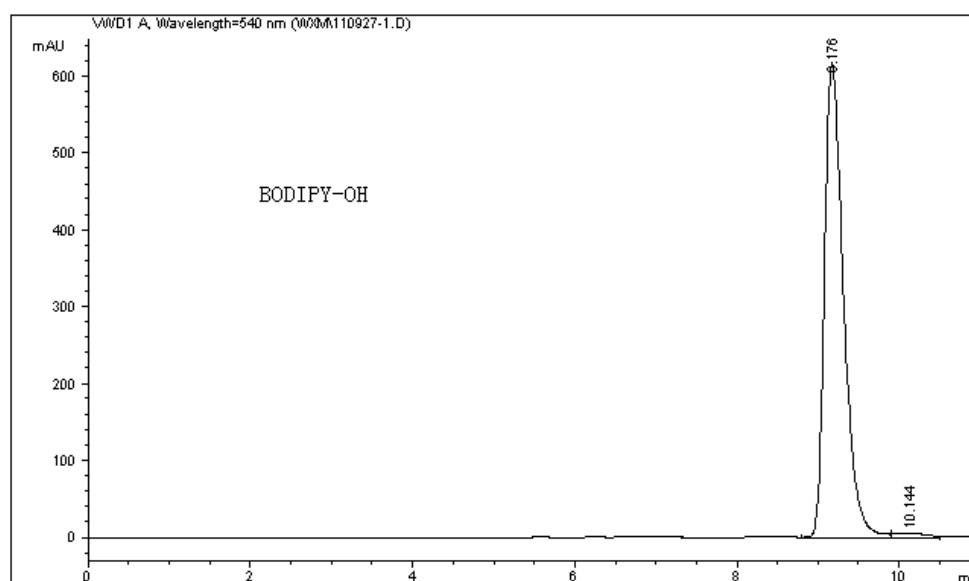

Figure S7. HPLC analysis of BODIPY-OH.

0.6ml/min 540nm CH<sub>3</sub>CN:H<sub>2</sub>O=9:1

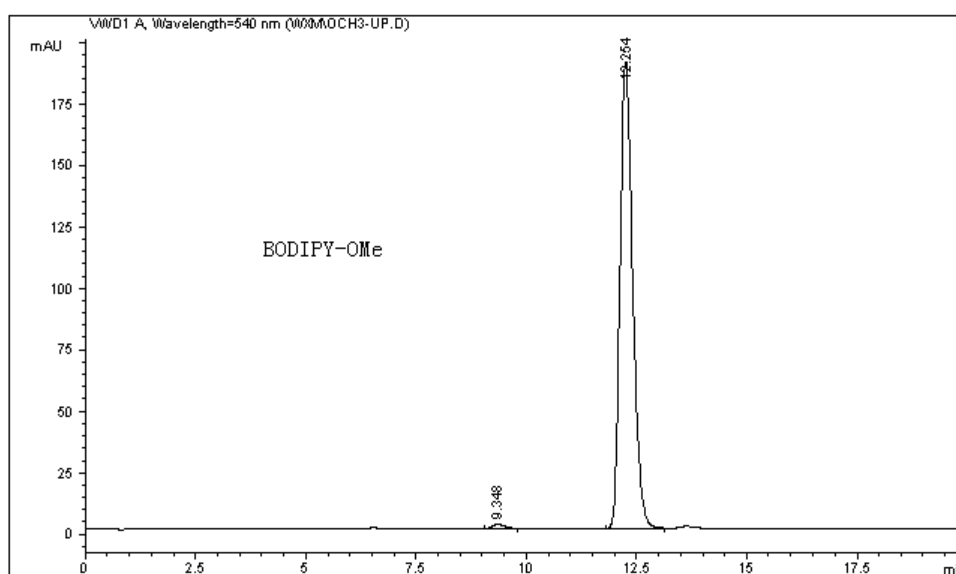

Figure S8. HPLC analysis of BODIPY-OMe.

Table S3. Analytical HPLC conditions for **BODIPY-OH** and **BODIPY-OMe**.

| Compound          | Rt (min) | elute                                     | Area    |
|-------------------|----------|-------------------------------------------|---------|
| <b>BODIPY-OH</b>  | 9.716    | CH <sub>3</sub> CN:H <sub>2</sub> O = 7:3 | 98.7537 |
| <b>BODIPY-OMe</b> | 12.254   | CH <sub>3</sub> CN:H <sub>2</sub> O = 9:1 | 99.2292 |

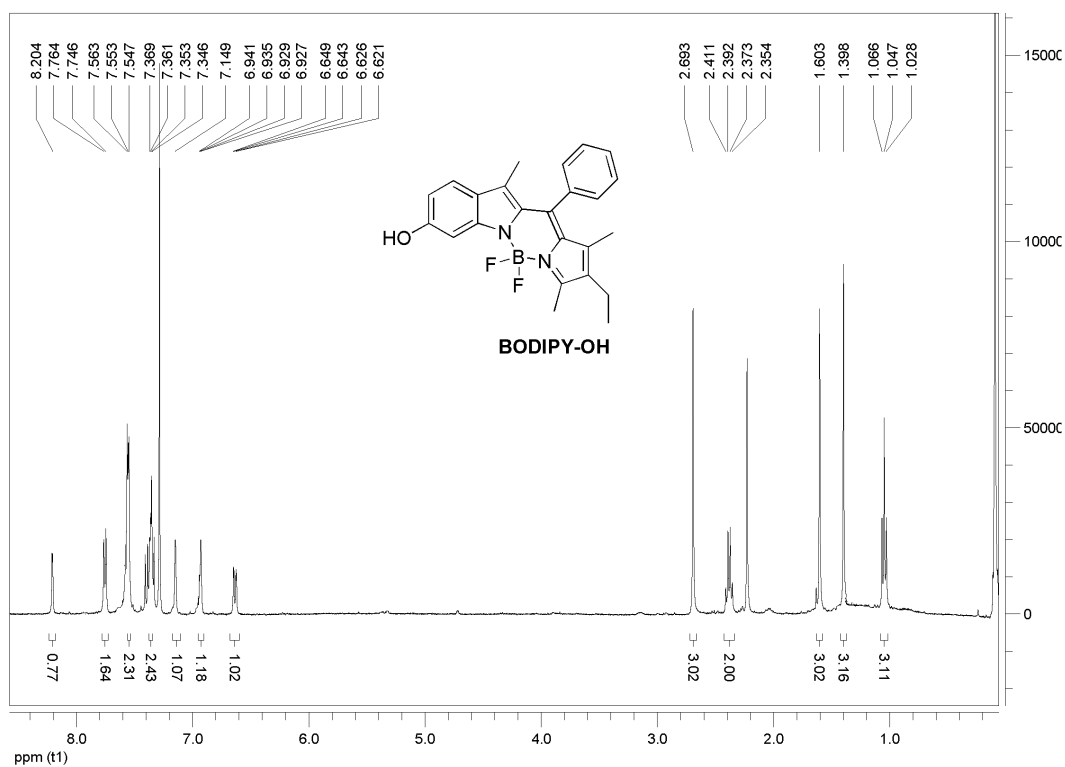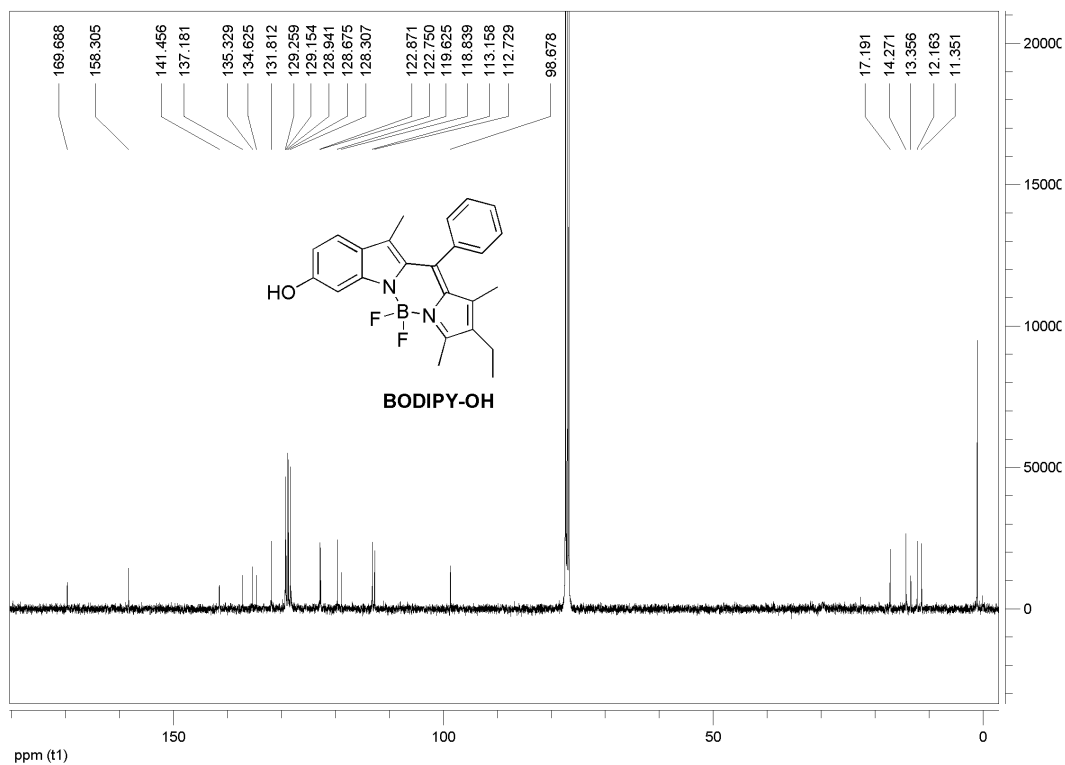

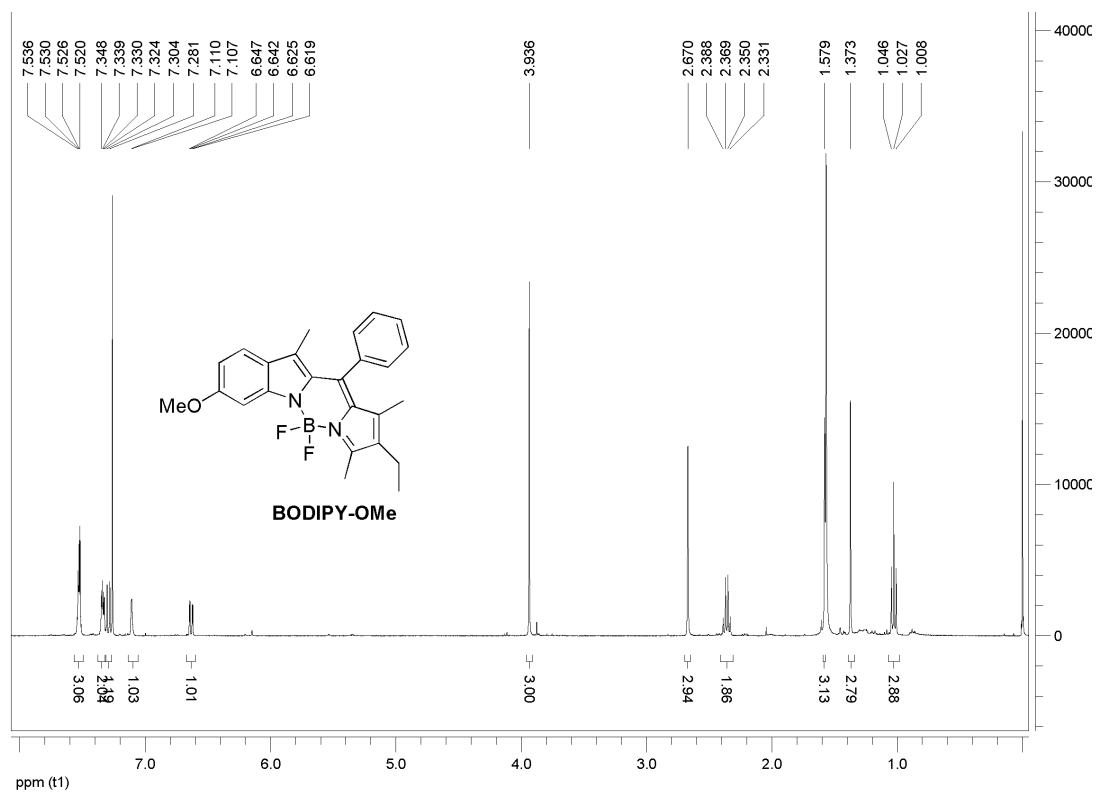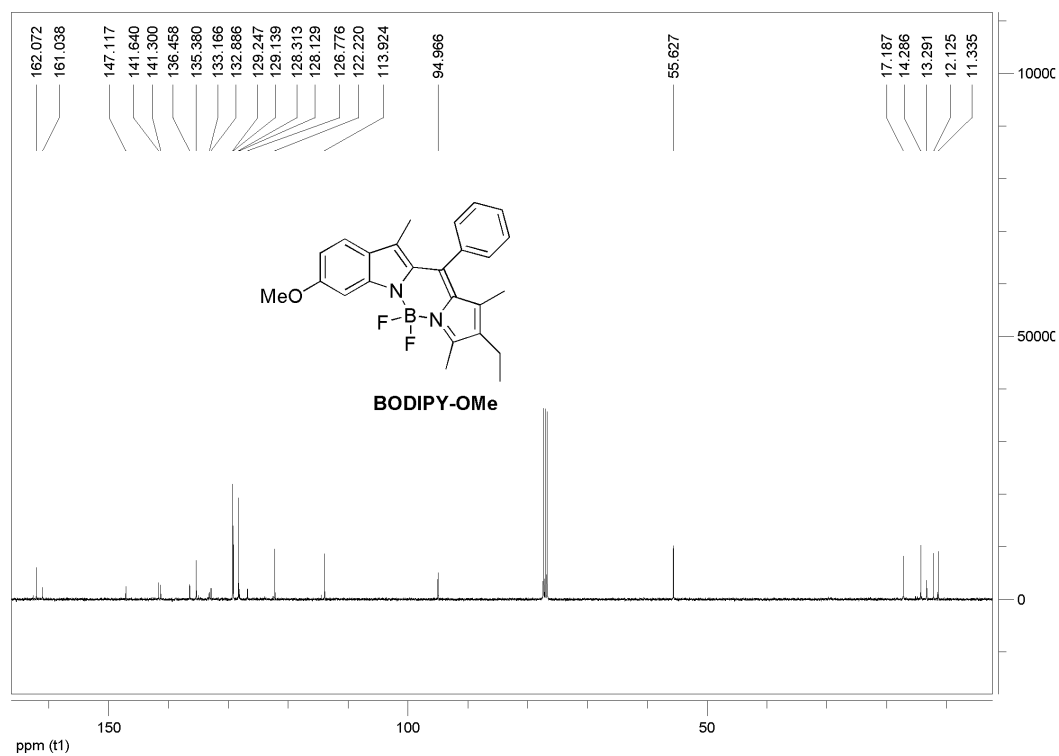

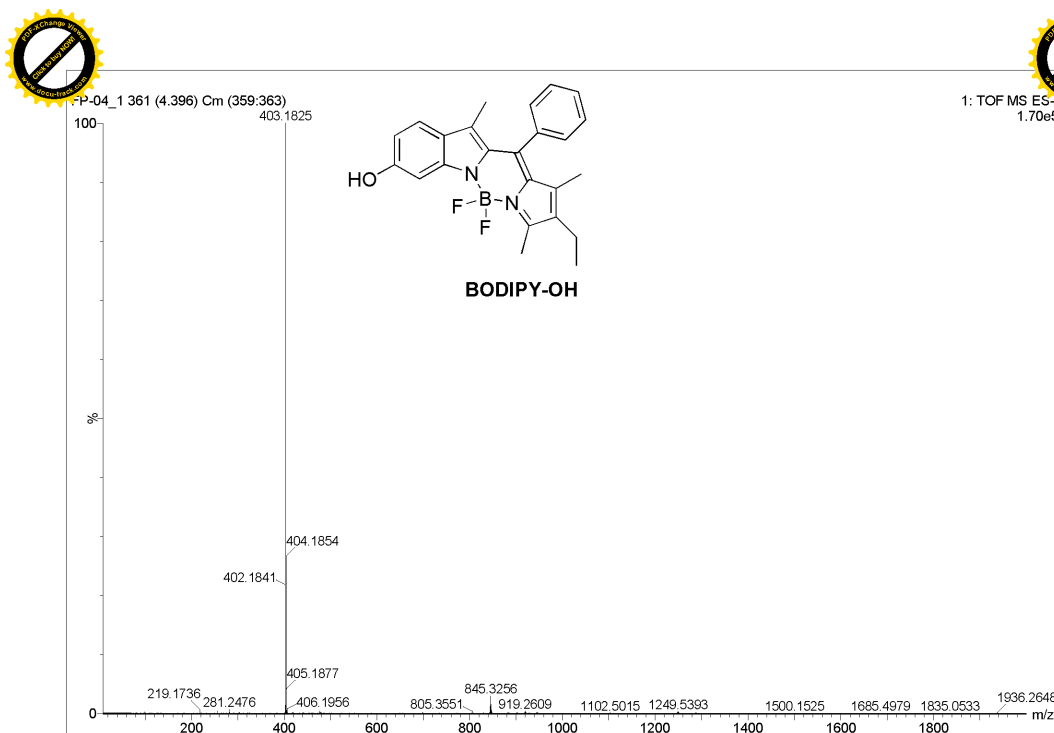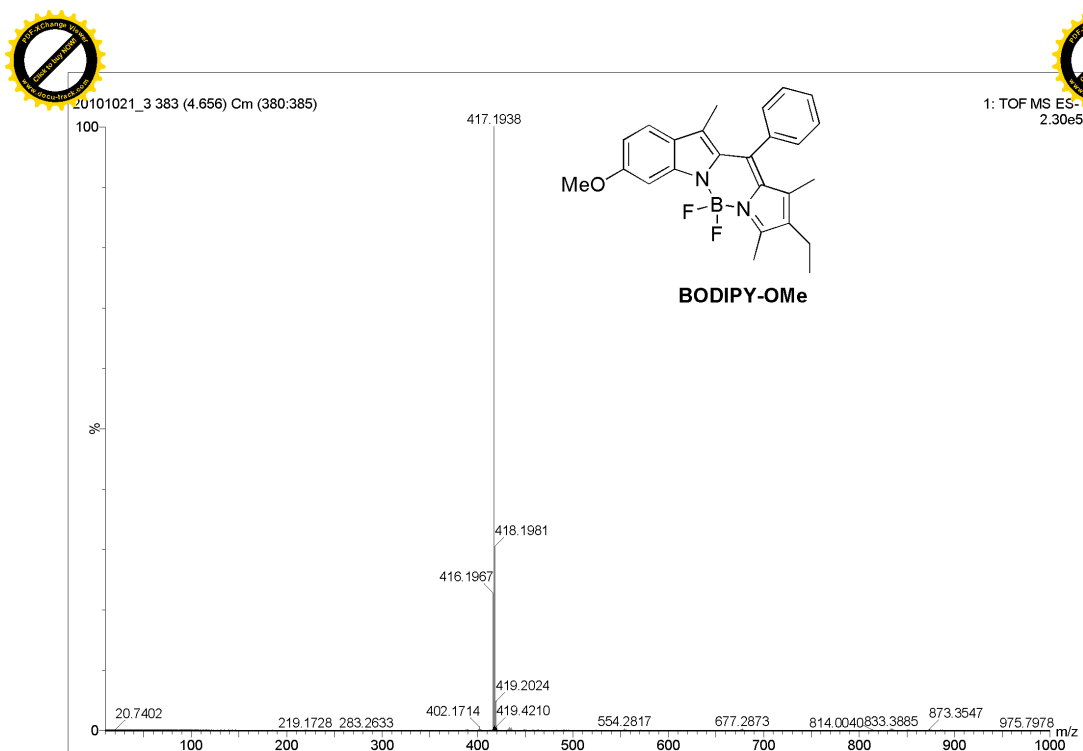

Supplement: c1ob06200j.pdf [file c1ob06200j.pdf]
